# Supplementary material
Source: publisher figshare collection journal article supplement (https://sage.figshare.com/ndownloader/files/17771309)
Supplement: Supplementary file 1 [file 17771309]

**Supplemental material for “Smoke-free or not: Attitudes toward indoor smoke-free policies among permanent supportive housing residents” by Petersen, AB, Elser, H, Nguyen, T, Alizaga, NM and Vijayaraghavan, M for *American Journal of Health Promotion*.**

**Supplemental Figure 1.** Attitudes towards smoke-free policies (% strongly agree and agree)

(N=36)

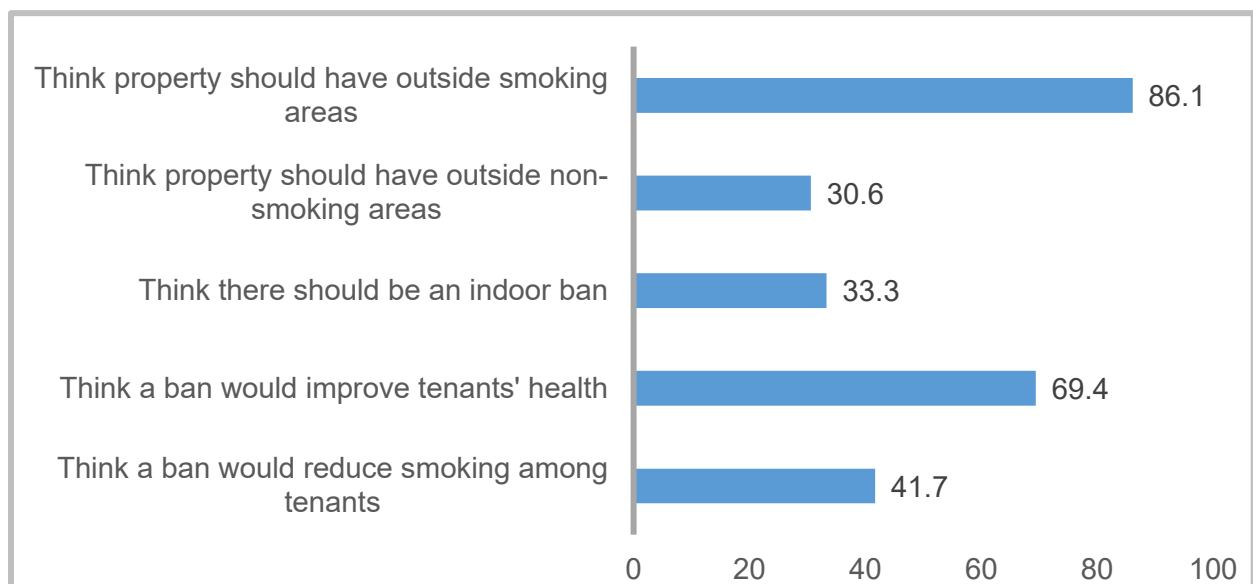

**Supplemental Figure 2.** Anticipated responses to a smoke-free policy that restricted smoking in indoor living areas (% strongly agree and agree) ( $N=36$ )

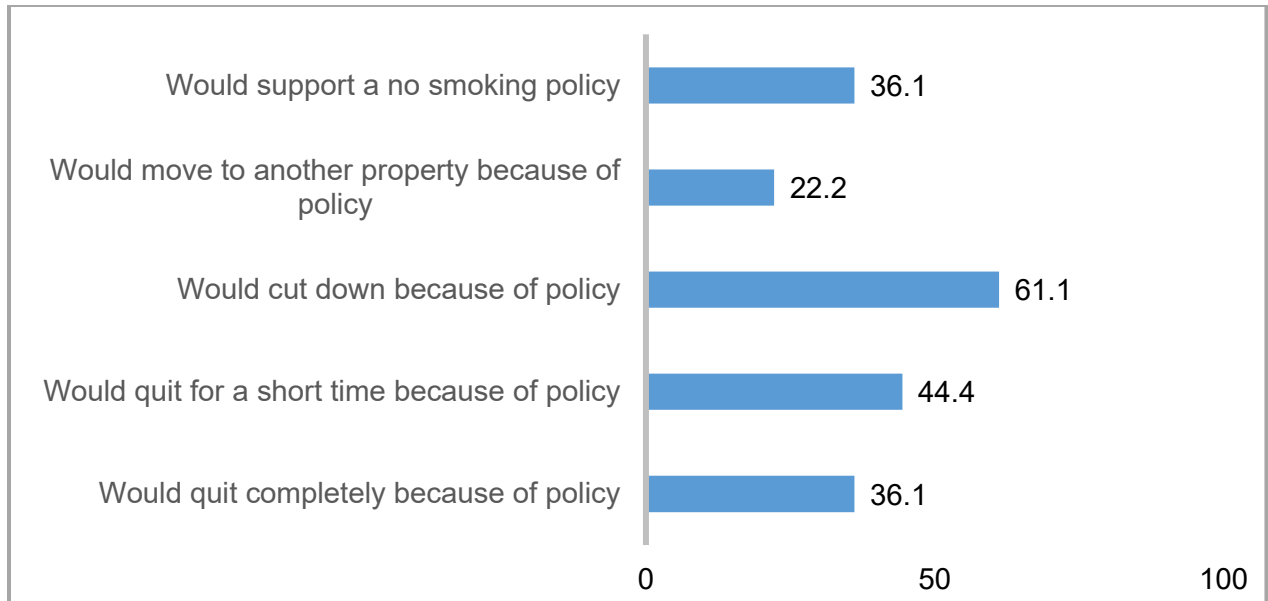

**Supplemental Table 1:** Beliefs about smoking and second-hand smoke (SHS) exposure (N=36)

|                              | <b>Believe smoking is allowed in apartments – n (%)</b> | <b>Believe smoking is allowed in indoor shared areas– n (%)</b> | <b>Believe smoking is allowed in outdoor shared areas– n (%)</b> | <b>Believe smoking is allowed in other outdoor areas – n (%)</b> |
|------------------------------|---------------------------------------------------------|-----------------------------------------------------------------|------------------------------------------------------------------|------------------------------------------------------------------|
| <b>Allowed</b>               | 23 (63.9)                                               | 0 (0.0)                                                         | 26 (72.2)                                                        | 27 (75.0)                                                        |
| <b>Not allowed</b>           | 12 (33.3)                                               | 36 (100.0)                                                      | 10 (27.8)                                                        | 2 (5.6)                                                          |
| <b>Don't know</b>            | 1 (2.8)                                                 | 0 (0.0)                                                         | 0 (0.0)                                                          | 7 (19.4)                                                         |
|                              | <b>Exposed to SHS smoke in apartment– n (%)</b>         | <b>Exposed to SHS in indoor shared areas– n (%)</b>             | <b>Exposed to SHS in shared outdoor areas– n (%)</b>             | <b>Exposed to SHS in other outdoor areas– n (%)</b>              |
| <b>Every day</b>             | 5 (13.9)                                                | 8 (22.2)                                                        | 16 (44.4)                                                        | 18 (50.0)                                                        |
| <b>A few times per week</b>  | 3 (8.3)                                                 | 2 (5.6)                                                         | 2 (5.6)                                                          | 2 (5.6)                                                          |
| <b>A few times per month</b> | 1 (2.8)                                                 | 2 (5.6)                                                         | 1 (2.8)                                                          | 3 (8.3)                                                          |
| <b>Hardly ever</b>           | 5 (13.9)                                                | 3 (8.3)                                                         | 5 (13.9)                                                         | 4 (11.1)                                                         |
| <b>Never</b>                 | 22 (61.1)                                               | 21 (58.3)                                                       | 12 (33.3)                                                        | 9 (25.0)                                                         |
